# Supplementary material for: Cognitive and Emotional Differences in Daytime and Nighttime Tourist Experiences in Historic Neighborhoods: A Combined Eye-Tracking and Neuroergonomic Experiment
Source: Research Square preprint supplement (doi:10.21203/rs.3.rs-7283321/v1), 2025-10-29
Supplement: Supplementary file 1 [file 6be7cf34c28e472ef597ce9d.docx]

**Table A.** Criteria and details of sample selection in this experiment

| **Scenes** | | **Entrance** | **Street** | **Square** |
| --- | --- | --- | --- | --- |
| **Daytime** | | 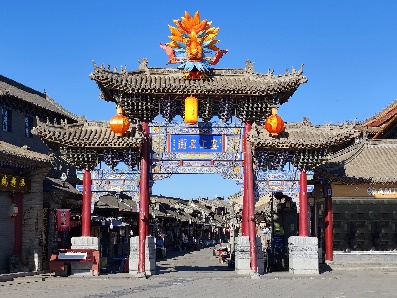 | 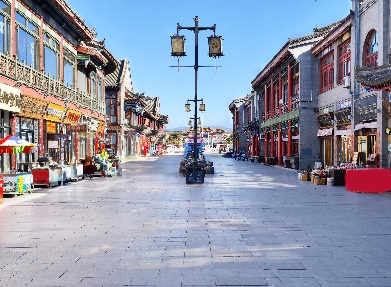 | 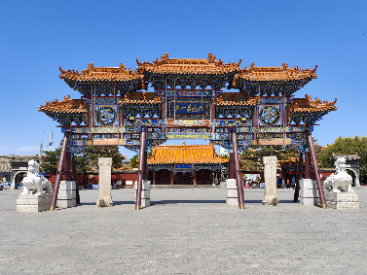 |
| **Nightime** | | 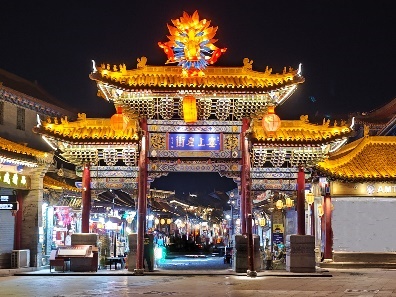 | 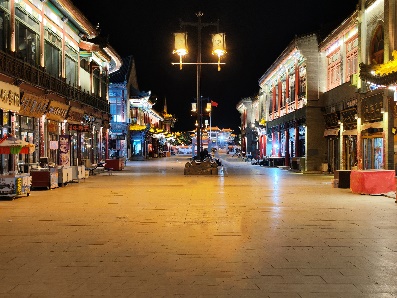 | 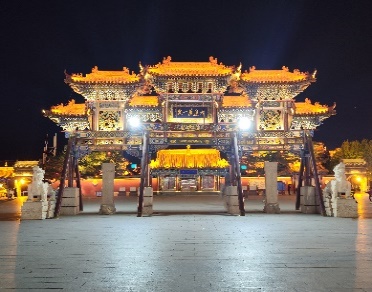 |
| **Selection criteria** | | Entrances should have a strong entrance orientation, be decorated with easily recognizable signs, and be in harmony with the architectural style of local features | Buildings on both sides have clear elements of historic and cultural character, with a wealth of commercial activity and traditional stores, and straight, appropriately scaled roads | Connected to several surrounding streets, it is a center for visitors to gather, rest and socialize, with landmark sculptures and pagodas |
| **Main building** | Location in photo | Centering | Both sides | Centering |
| Percentage of buildings | 48% | 41% | 40% |
| **Environmental elements** | Percentage of the sky | 31% | 17% | 28% |
| Percentage of ground | 11% | 40% | 26% |
| Percentage of other elements | 10% | 2% | 6% |

**Table B.** Detailed information of experimental equipment in this experiment

| **Data types** | **Name of equipment** | **Name of equipment** | | **Device Wearing Style** |
| --- | --- | --- | --- | --- |
| **EEG** | ErogoLAB Hydroelectric  EEG | Acquisition range:-1500μV-1500μV, accuracy:0.183μV, Aampling rate:1024 Hz, Number of channels:16 | | The EEG cap, moistened with Link Cotton, was worn in a front-to-back sequence and positioned by electrode position, and the ear clip was secured right in the middle of the earlobe |
| **EDA** | ErgoLAB Wireless Human Factors Physiology Logger | Acquisition range: 0-30μs, Accuracy: 0.01μs, Sampling rate: 2048hz | | The main body of the wireless device was secured to the wrist of the subject's nondominant hand (both left-handed), with the finger clips secured to the subject's index and middle fingers, with the snap fasteners facing inward (finger-belly position) |
| **HRV** | Acquisition range: 0-240bpm, Sampling rate: 2048 Hz | | The main body of the wireless device was fixed at the arm of the subject's non-dominant hand, and the ear clip was clamped at the center of the earlobe. |
| **RESP** | Acquisition range: 0-100%, Accuracy: 0.01%, Sampling rate: 2048 Hz | | Attach the main body of the wireless device to the respiratory strap, adjust the length of the strap and wear it on the lower part of the subject's chest or abdomen. |
| **Eye tracking** | Tobii Pro X3-120 | Sampling rate: 120Hz,Accuracy: 0.24°, Accuracy: 0.4°. | Head movement distance: 50-90cm, head movement range: @80cm: 50cm×40cm | Attach the eye-tracker to the center of the bottom of the computer screen. |
| **Computer equipment** | Computers | Processor：Intel(R) Core(TM) i5-10400F， | GPU NVIDIA GeForece RTX 2060 |  |
| Computer screens | Size：27inches，Resolution：2560*1440，Refresh rate：165Hz | |  |

**Table C.** Emotional Measurement Scale

| **Research dimensions** | **Measurement content** | **Reference sources** |
| --- | --- | --- |
| **Pleasure** | Are you happy with seeing this set of day/night scenes?  Do you feel relaxed after seeing this day/night scene?  Are you satisfied with the day/night scene?  Did you enjoy seeing the day/night scenes? | Sun et al [59] |
| **Arousal** | Are you excited about seeing this set of day/night scenes?  Do you feel excited after seeing this set of day/night scenes?  Are you excited about the day/night scenes you have seen?  Were you surprised by what you saw? |

**Table D.** Detailed information on specialized terms for eye tracking and physiological and psychological indicators in this paper

| **Measurement methods** | **Specific indicators** | | **Abbreviations** | **Basic meaning** |
| --- | --- | --- | --- | --- |
| **Eye tracking** | Fixations count（N） | FC | | It reflects the extent to which an individual's attention is focused on a given stimulus. A higher FC indicates that the stimulus has attracted greater visual attention. |
| Average fixation time （S） | | AFT | It reflects the depth to which an individual processes information while gazing at a given stimulus. As time increases, the individual's difficulty in processing information increases |
| Total saccade count（N） | | TSC | This reflects an individual's efficiency in visual search tasks and their ability to allocate attention to processing visual information. A higher TSC indicates that the individual's attention is more dispersed across the stimulus. |
| Pupil diameter（mm） | | PD | This reflects the individual's attention and cognition. Higher PD and MPD indicate an increased attentional focus and cognitive load. |
| Maximum PD（mm） | | MPD |
| **EEG** | Alpha wave | | α | Alpha and beta waves serve as electrophysiological markers of visuospatial attention. Visual stimuli suppress alpha wave activity while increasing the power of beta waves. |
| Beta wave | | β |
| Theta wave | | θ | Frontal midline theta is a neurobiological marker linked to cognitive control demands. Increased theta power indicates that an individual exerts greater cognitive control. |
| θ/β | | TBR | There was a negative correlation with attentional control, where higher TBR values indicate reduced attentional control and slower information processing. |
| Frontal alpha asymmetry | | FAA | It is an important indicator of an individual's emotional state. Higher FAA indicates that individuals have higher positive emotions |
| **HRV** | Heart rate | | HR | It is a basic indicator of the dimension of emotional pleasure and is positively correlated with the degree of pleasure |
| Root mean square of the successive differences | | RMSSD | Reflects vagal tone and is negatively correlated with HR |
| Low frequency to high frequency ratio | | LF/HF | Reflects the balance between the sympathetic and parasympathetic nervous systems and is negatively correlated with HR |
| **EDA** | Skin conductance | | SC | Positively correlated with emotional arousal |
| Skin conductance level | | SCL | Reflects the individual's underlying physiological state and is positively correlated with the level of arousal. |
| Skin conductance response | | SCR | Used to assess the strength of an individual's response to a specific stimulus, positively correlated with arousal state |

**Table E.** Mean and standard deviation of mean frontal alpha power, mean occipito-parietal beta power, mean frontal theta power, and theta to beta ratio when subjects viewed scenes of historical neighbourhoods.

|  | **Street**  **Mean（SD）** | | **Entrance**  **Mean（SD）** | | **Square**  **Mean（SD）** | |
| --- | --- | --- | --- | --- | --- | --- |
| **EEG** | **Daytime** | **Nightime** | **Daytime** | **Nightime** | **Daytime** | **Nightime** |
| **α** | -3.068(2.321) | -3.382(2.150) | -3.369（2.069） | -3.216（2.211） | -3.216(2.027) | -3.077(2.128) |
| **β** | -0.817(1.329) | -0.699( 1.490) | -0.879（1.364） | -0.680（1.583） | -0.896(1.297) | -0.793(1.351) |
| **θ** | 3.207(2.181) | 3.730(2.201) | 3.123（2.417） | 3.507（2.463） | 3.44(2.389) | 3.570(2.286) |
| **θ/β** | 2.507(1.844) | 2.092(1.743) | 2.321（1.868） | 2.065（1.675） | 2.280(1.710) | 2.024(1.808) |

**Table F.** Mean and standard deviation of PD and MPD when subjects viewed scenes from historic districts.

|  | | | **Street**  **Mean（SD）** | | | | **Entrance**  **Mean（SD）** | | | | **Square**  **Mean（SD）** | | | |
| --- | --- | --- | --- | --- | --- | --- | --- | --- | --- | --- | --- | --- | --- | --- |
|  | | | Daytime | | Nightime | | Daytime | Nightime | | | Daytime | | | Nightime |
| **PD** | | | 2.860(0.543) | | 3.149(0.521) | | 3.144（0.559） | 3.157（0.588） | | | 2.941(0.428) | | | 3.214(0.578) |
| **MPD** | | | 3.380(0.648) | | 3.710(0.604) | | 3.555（0.654） | 3.660（0.647） | | | 3.441(0.509) | | | 3.773(0.683) |
| **FC** | | 53.731(11.028) | | | | 51.223(11.852) | 54.439（10.415） | 52.254（11.924） | | 54.762(8.789) | | 51.131(10.497) | | |
| **AFT** | | 0.286(0.074) | | | | 0.300(0.079) | 0.284（0.062） | 0.299（0.074） | | 0.287(0.057) | | 0.308(0.075) | | |
| **TSC** | 67.875(13.389) | | | 65.542(15.999) | | | 70.819（9.982） | 65.153（13.504） | 65.222(10.689) | | | | 64.000(14.828) | |

**Table G.**Means and standard deviations of subjects' frontal alpha asymmetry (FAA) while viewing scenes from historic neighborhoods.

|  | Street  Mean（SD） | | Entrance  Mean（SD） | | Square  Mean（SD） | |
| --- | --- | --- | --- | --- | --- | --- |
| EEG | Daytime | Nightime | Daytime | Nightime | Daytime | Nightime |
| FAA | 1.558(3.050) | 1.793(1.781) | 2.191（2.829） | 1.406（1.982） | 2.473(2.977) | 1.775(2.407) |

**Table H.**Mean and standard deviation of SC, SCL, and SCR while subjects viewed scenes from historic neighborhoods.

|  | **Street**  **Mean（SD）** | | **Entrance**  **Mean（SD）** | | **Square**  **Mean（SD）** | |
| --- | --- | --- | --- | --- | --- | --- |
| **EDA** | Daytime | Nightime | Daytime | Nightime | Daytime | Nightime |
| **SC** | 1.742(0.088) | 1.709(0.082) | 1.712（0.073） | 1.705（0.059） | 1.745(0.069) | 1.704(0.131) |
| **SCL** | 1.057(0.511) | 1.061(0.587) | 1.503（0.545） | 1.102（0.371） | 1.094(0.528) | 1.137(0.385) |
| **SCR** | 0.719(0.165) | 0.735(0.167) | 0.731（0.151） | 0.746（0.166） | 0.716(0.143) | 0.746(0.123) |

**Table I.** Mean and standard deviation of mean HR, RMSSD, and LF/HF while subjects viewed scenes from historic neighborhoods.

|  | **Street**  **Mean（SD）** | | **Entrance**  **Mean（SD）** | | **Square**  **Mean（SD）** | |
| --- | --- | --- | --- | --- | --- | --- |
| **HRV** | Daytime | Nightime | Daytime | Nightime | Daytime | Nightime |
| **Mean**  **HR** | 3.478 (0.397) | 3.499 (0.380) | 3.469（0.404） | 3.501（0.360） | 3.481(0.421) | 3.491(0.397) |
| **RMSSD** | 4.572(0.751) | 4.558(0.853) | 4.572（0.784） | 4.556（0.783） | 4.553(0.834) | 4.567(0.702) |
| **LF/HF** | -0.173(1.121) | -0.264(1.179) | -0.188（1.1.025） | -0.008（1.144） | -0.011(1.150) | -0.077(1.149) |

**Table J.** Means and standard deviations of subjects' ratings of pleasantness and arousal in response to scenes from historic neighborhoods.

|  | **Street**  **Mean（SD）** | | **Entrance**  **Mean（SD）** | | **Square**  **Mean（SD）** | |
| --- | --- | --- | --- | --- | --- | --- |
|  | Daytime | Nightime | Daytime | Nightime | Daytime | Nightime |
| **Pleasure** | 3.146 (0.995) | 3.489 (0.835) | 3.183（0.900） | 3.231（0.921） | 3.254(0.893) | 3.634(0.625) |
| **Arousal** | 2.668(0.999) | 2.791(0.966) | 2.694（0.864） | 2.780（1.015） | 2.862(1.032) | 3.086(1.002) |
